# Supplementary figures and images for: Uncertainty modeling process for semantic technology
Source: PeerJ journal article supplement (doi:10.7717/peerj-cs.77), 2016-08-15

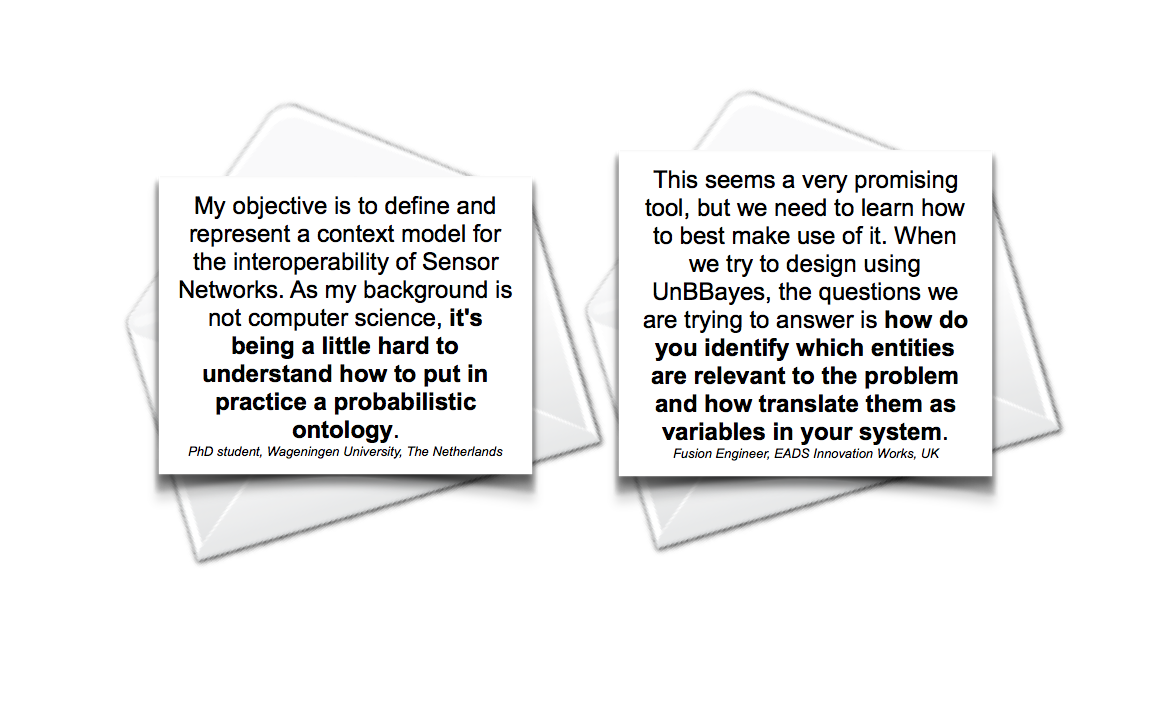


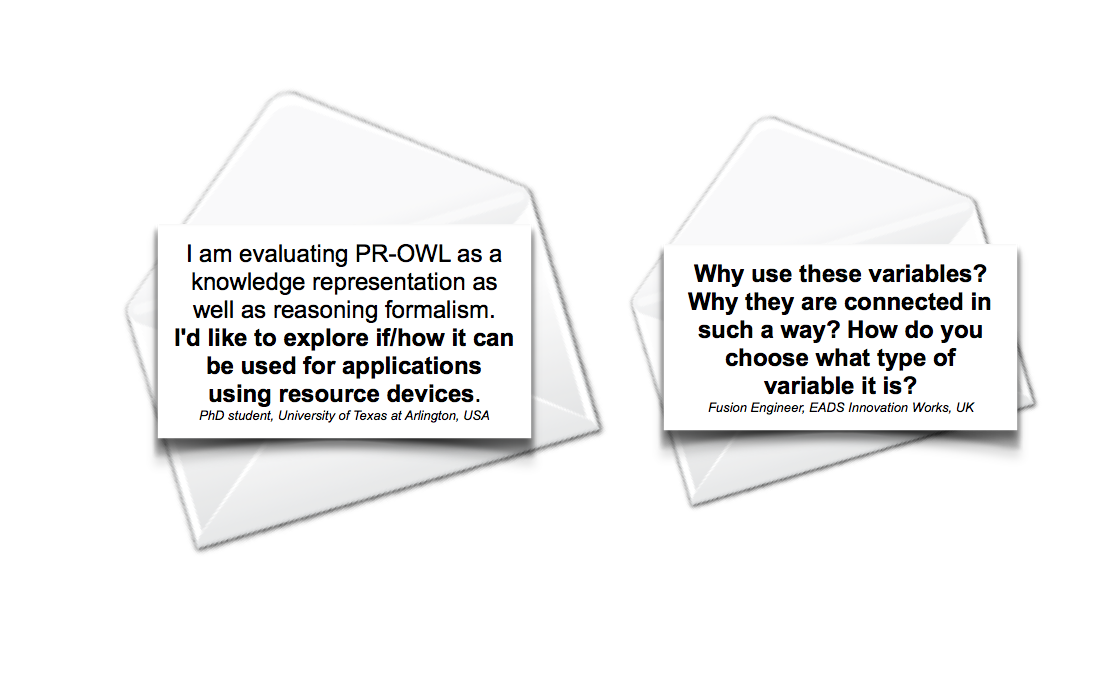


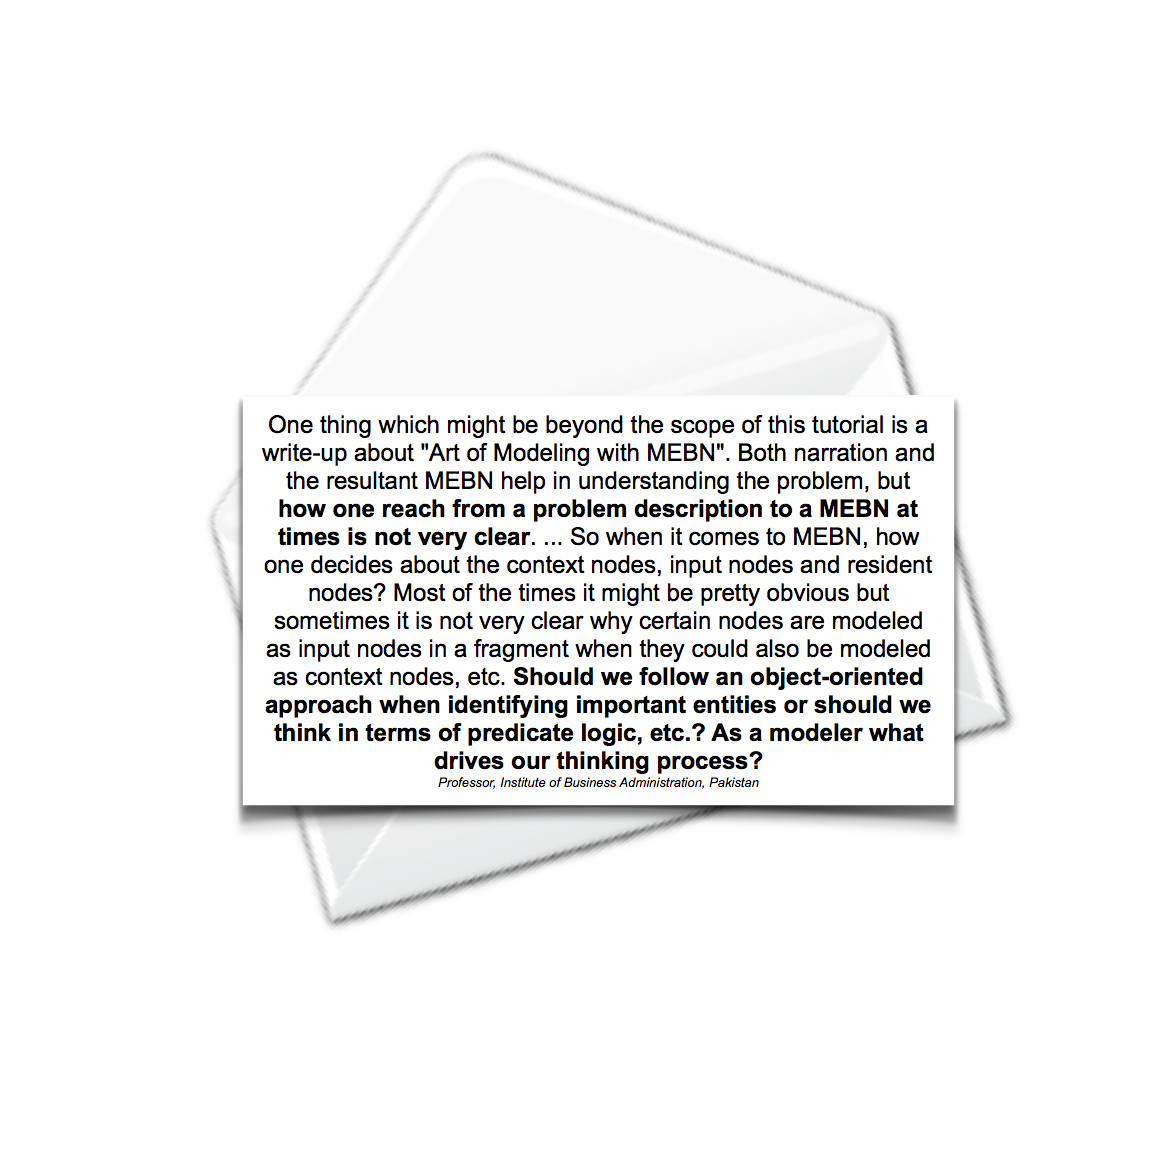

Supplement: E-mails.docx [file E-mails.docx]
